# Supplementary material for: Hawaiian monk seals exhibit behavioral flexibility when targeting prey of different size and shape
Source: Oxford University Press journal article supplement (doi:10.1242/jeb.194985), 2019-01-01
Supplement: jeb194985supp.pdf [file jeb194985supp.pdf]

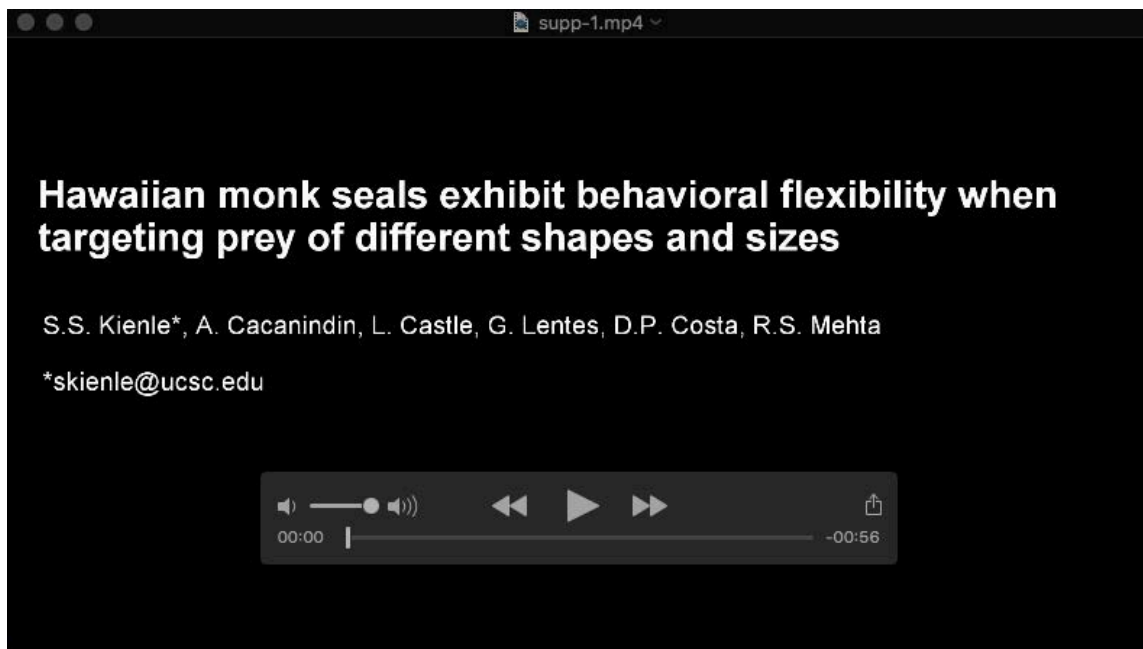

Movie 1. Examples of suction feeding and biting (pierce feeding) feeding strategies used by Hawaiian monk seals.
